# Supplementary material for: Spatial (mis)match between EEG and fMRI signal patterns revealed by spatio-spectral source-space EEG decomposition
Source: Frontiers journal article supplement (doi:10.3389/fnins.2025.1549172), 2025-03-14
Supplement: Image_1.pdf [file Image_1.pdf]

# Supplementary Material

## 1 SUPPLEMENTARY FIGURES

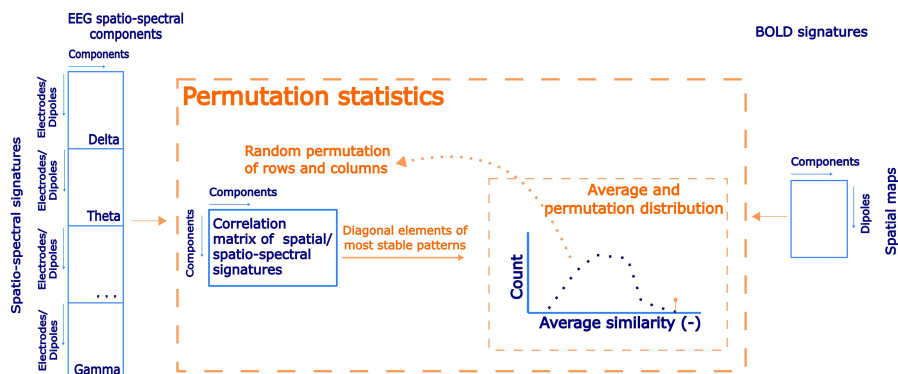

**Figure S1.** A schematic flowchart of a permutation spatial statistical testing of EEG spatio-spectral signatures and statistical GLM maps.

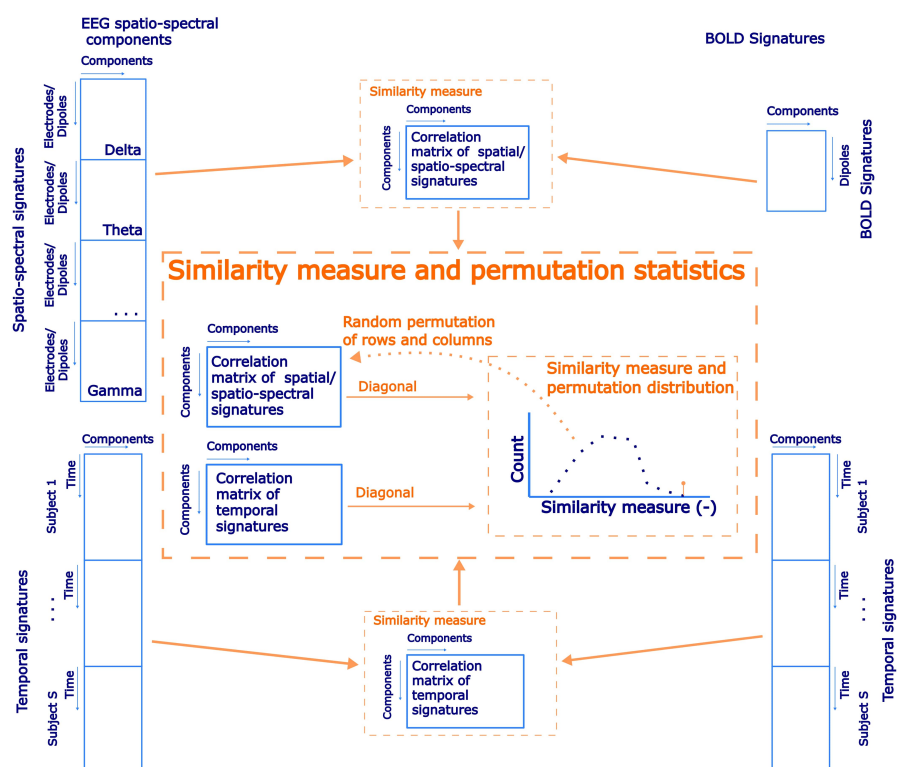

**Figure S2.** A schematic flowchart of a permutation spatio-temporal statistical testing of EEG spatio-spectral signatures and statistical GLM maps.

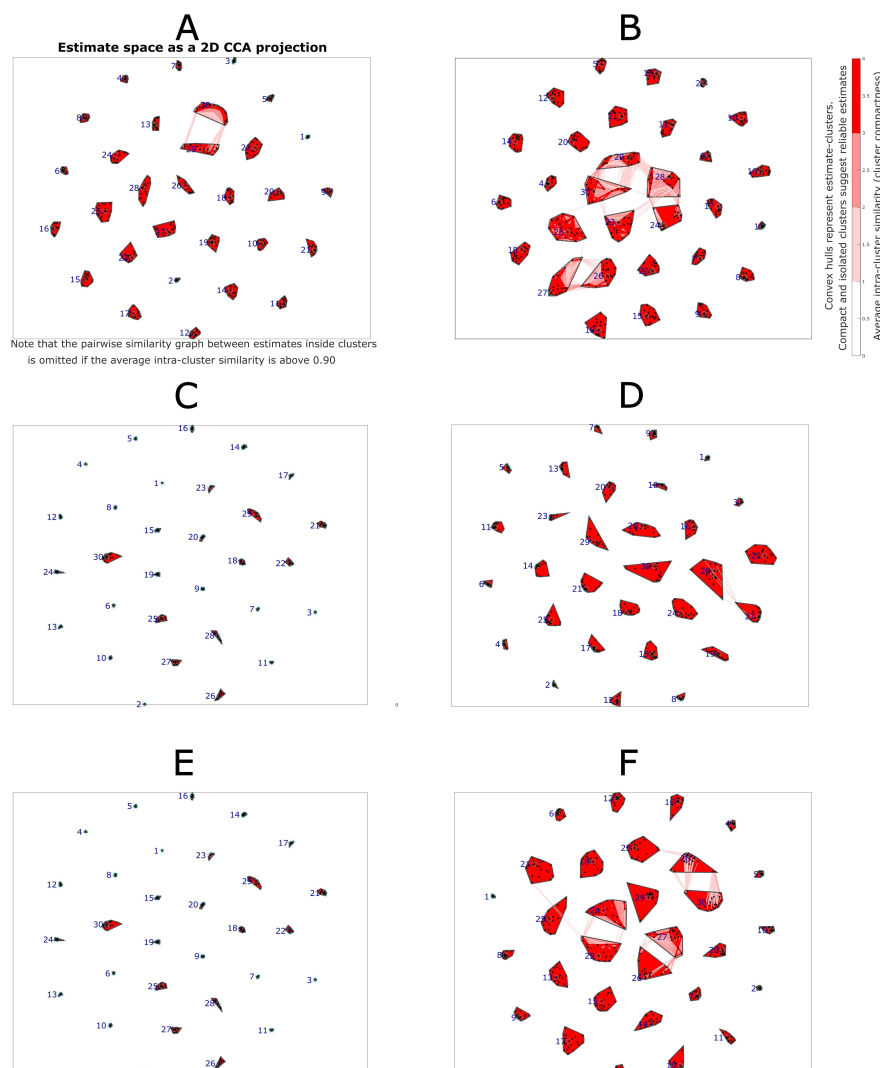

**Figure S3.** ICASSO visualization of defined clusters as 2D CCA projection for: (A) whole data set, electrode-space, (B) whole data set, source-space, (C) subset 1, electrode-space, (D) subset 1, source-space, (E) subset 2, electrode-space, (F) subset 2, source-space.

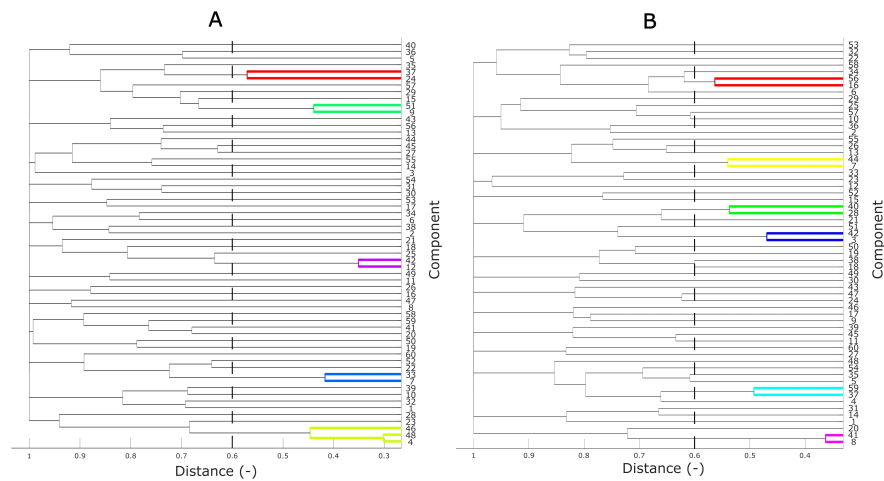

**Figure S4.** Hierarchical clustering dendrogram of components from both subsets labeled as 1-30 for components from the first subset and 31-60 as components from the second subset with nodes definition by a shortest distance method. The distance metric between components is defined by Equation 4 in the main text. Dashed line denotes a distance cut-off to define clusters both in **(A)** electrode-space, and **(B)** source-space spatio-spectral decomposition.
